# Supplementary material
Source: PubMed Central journal article supplement (PMC9710052)

# Additional file 5: Figure S4

**A**

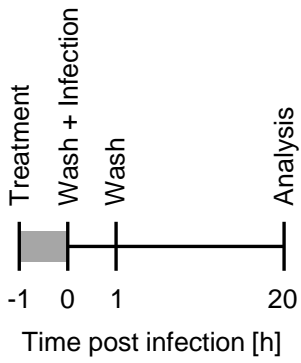

**B**

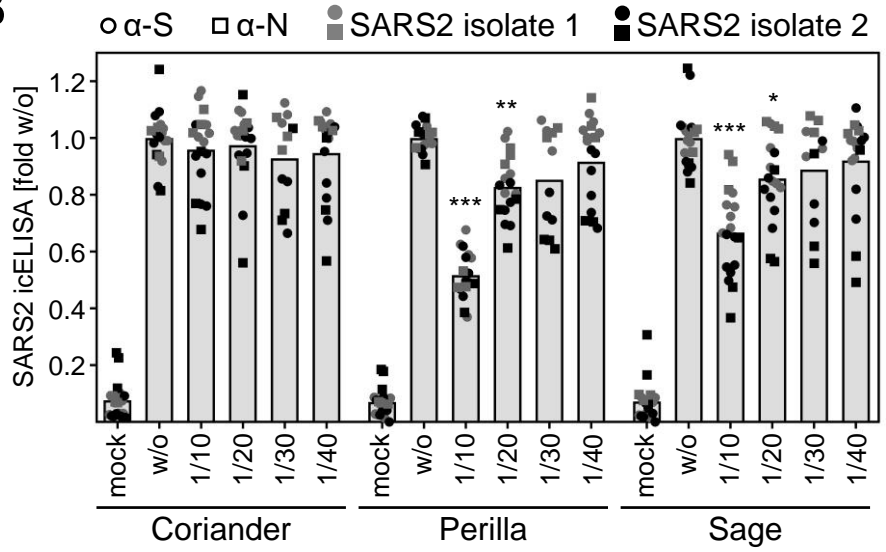

**C**

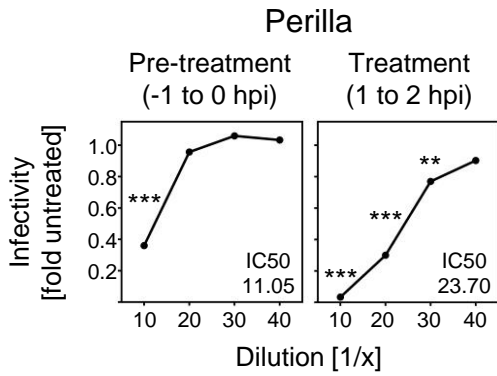

**D**

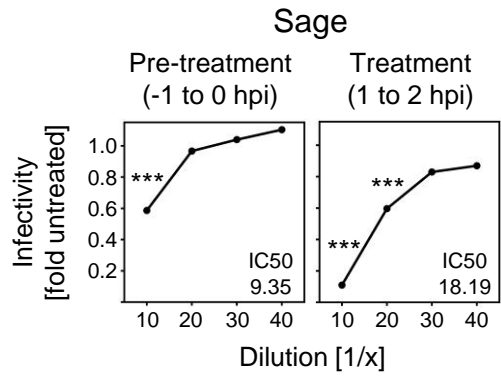

**E**

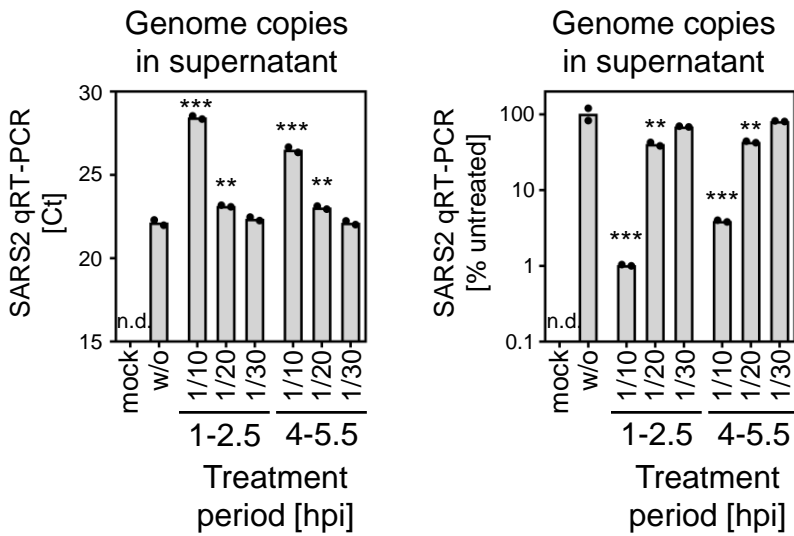

Supplement: 12915_2022_1468_MOESM5_ESM.pdf [file 12915_2022_1468_MOESM5_ESM.pdf]
