# Supplementary material
Source: PubMed Central journal article supplement (PMC9710052)

Additional file 7: Figure S6

**A**

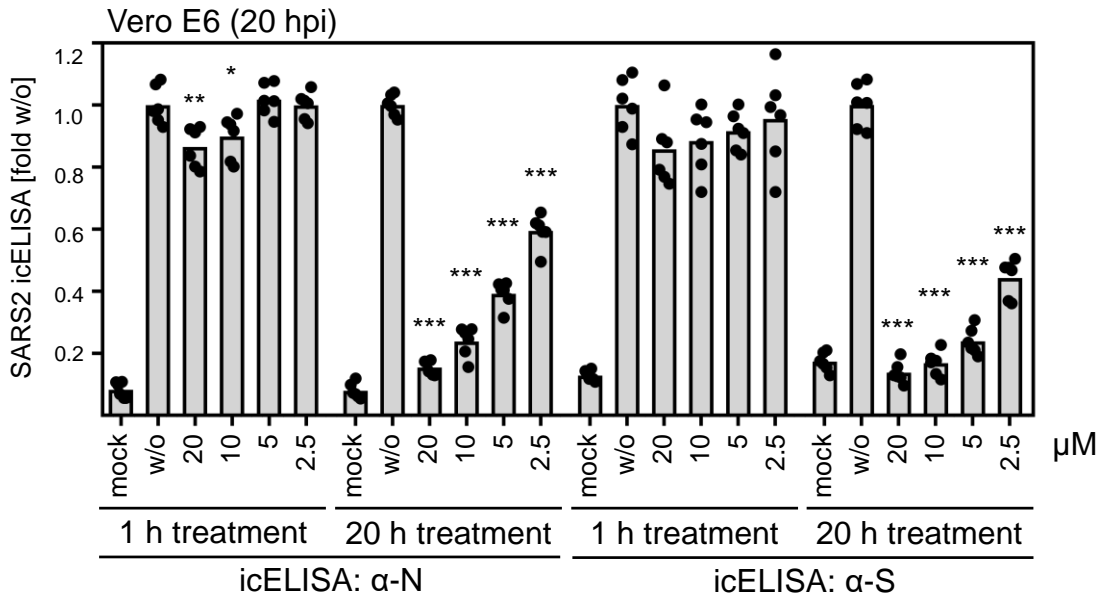

**B**

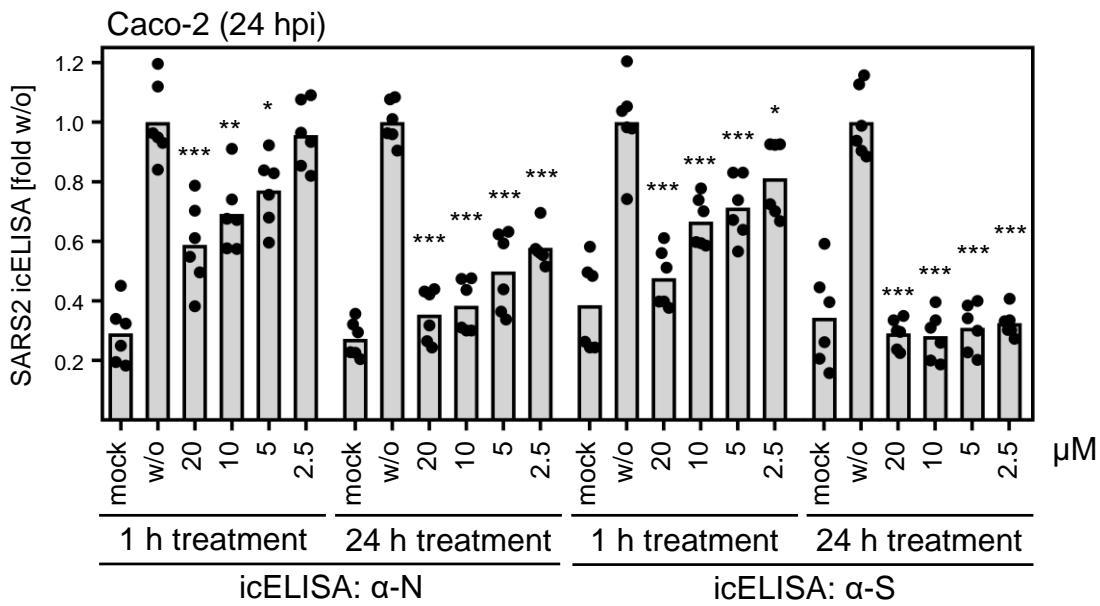

Supplement: 12915_2022_1468_MOESM7_ESM.pdf [file 12915_2022_1468_MOESM7_ESM.pdf]
