# Supplementary material
Source: PubMed Central journal article supplement (PMC9710052)

# Additional file 15: Figure S12

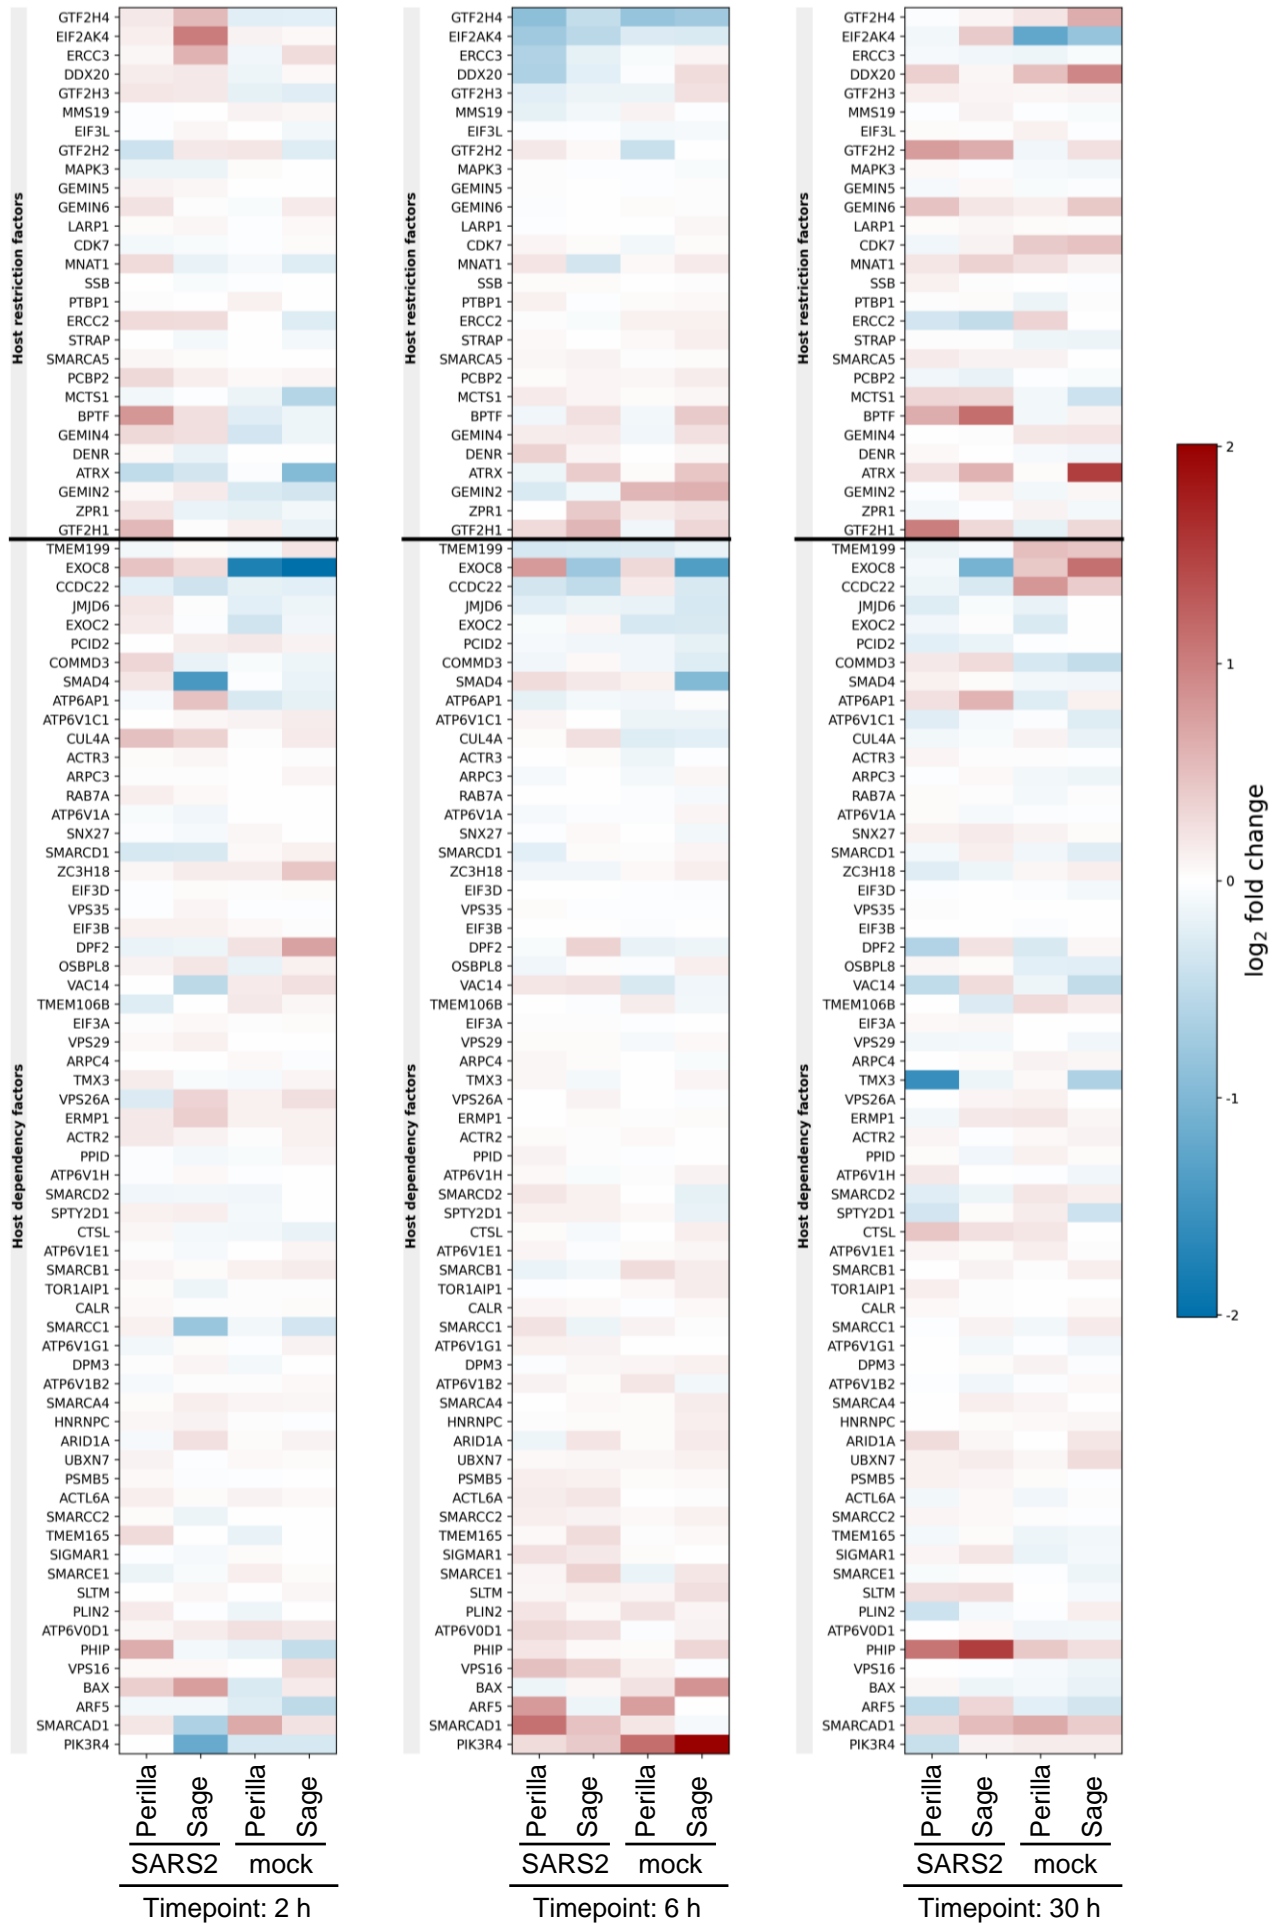

Supplement: 12915_2022_1468_MOESM15_ESM.pdf [file 12915_2022_1468_MOESM15_ESM.pdf]
