# Supplementary material
Source: PubMed Central journal article supplement (PMC9710052)

# Additional file 16: Figure S13

**A**

Infected Caco-2  
Untreated vs Perilla

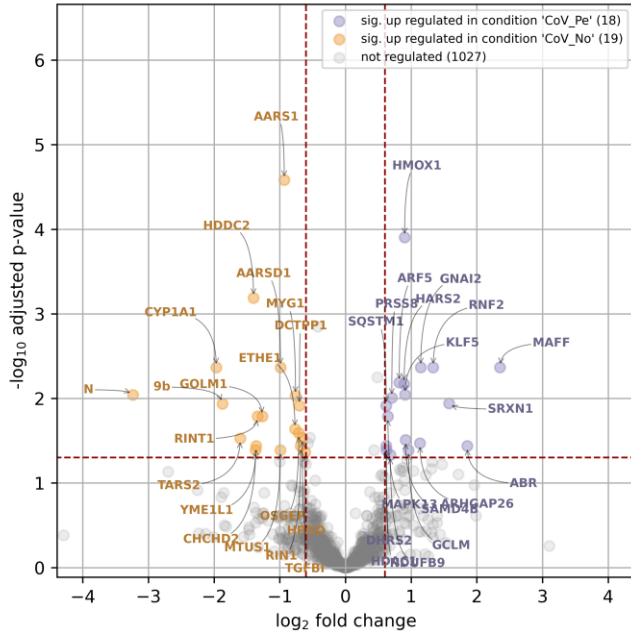

**B**

Infected Caco-2  
Untreated vs Sage

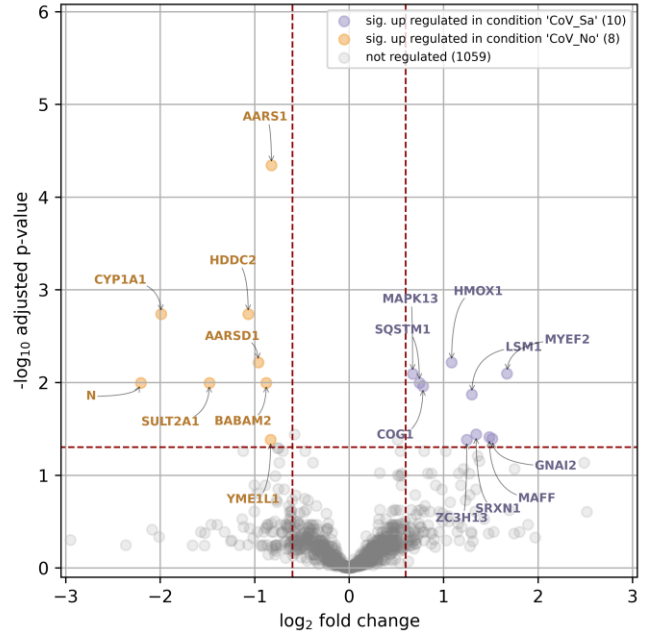

**C**

Infected Vero E6  
Untreated vs Perilla

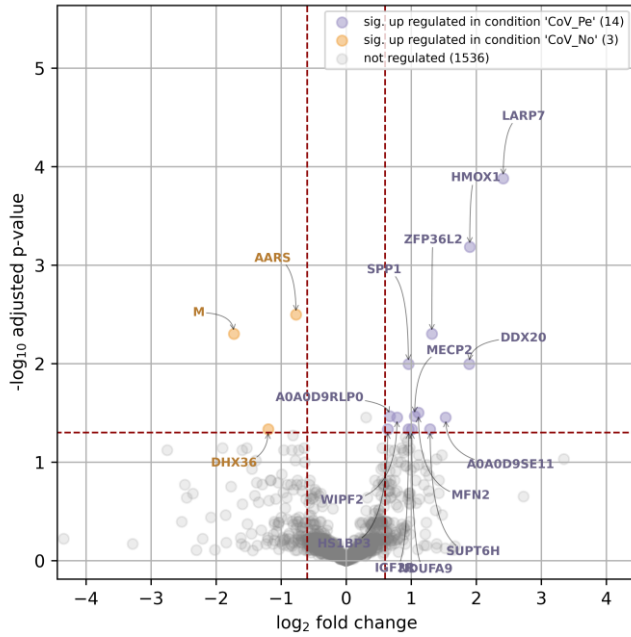

**D**

Infected Vero E6  
Untreated vs Sage

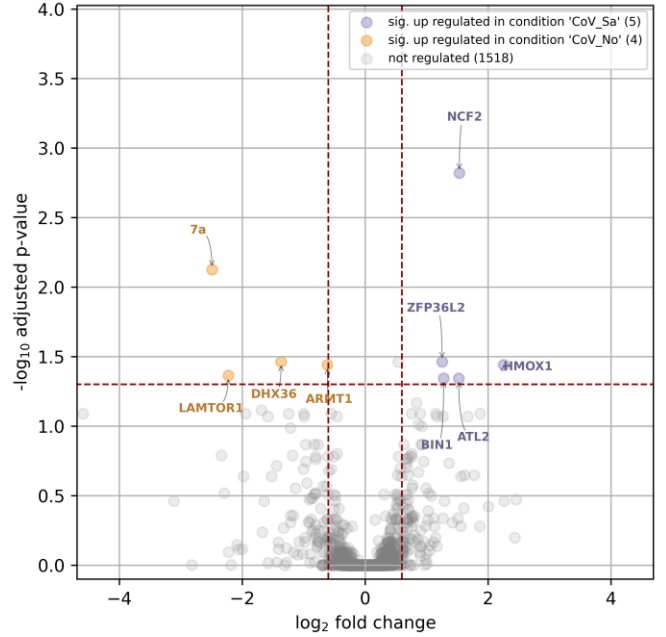

Supplement: 12915_2022_1468_MOESM16_ESM.pdf [file 12915_2022_1468_MOESM16_ESM.pdf]
